# Supplementary material
Source: MDPI journal article supplement (https://www.mdpi.com/1996-1073/15/7/2487)
Supplement: s1 [file s1]

## Supplementary Material

# Incineration Characteristics of Several Typical Industrial Polymeric Wastes: Kinetics and Products distribution

Shiqiao Yang<sup>1,2</sup>, Ming Lei<sup>1,\*</sup>, Min Li<sup>1</sup>, Chao Liu<sup>1</sup>, Beichen Xue<sup>1</sup>, Rui Xiao<sup>1,\*</sup>

*<sup>1</sup>Key Laboratory of Energy Thermal Conversion and Control of Ministry of Education,  
School of Energy and Environment, Southeast University, Nanjing, 210096, PR China*

*<sup>2</sup>Everbright Environmental Protection Technology Equipment (Changzhou) Co. Ltd.*

**\*Corresponding Author**

Tel: +86 18814124261;

Fax: +86 +86 83795726;

E-mail address: mingleiscut@hotmail.com

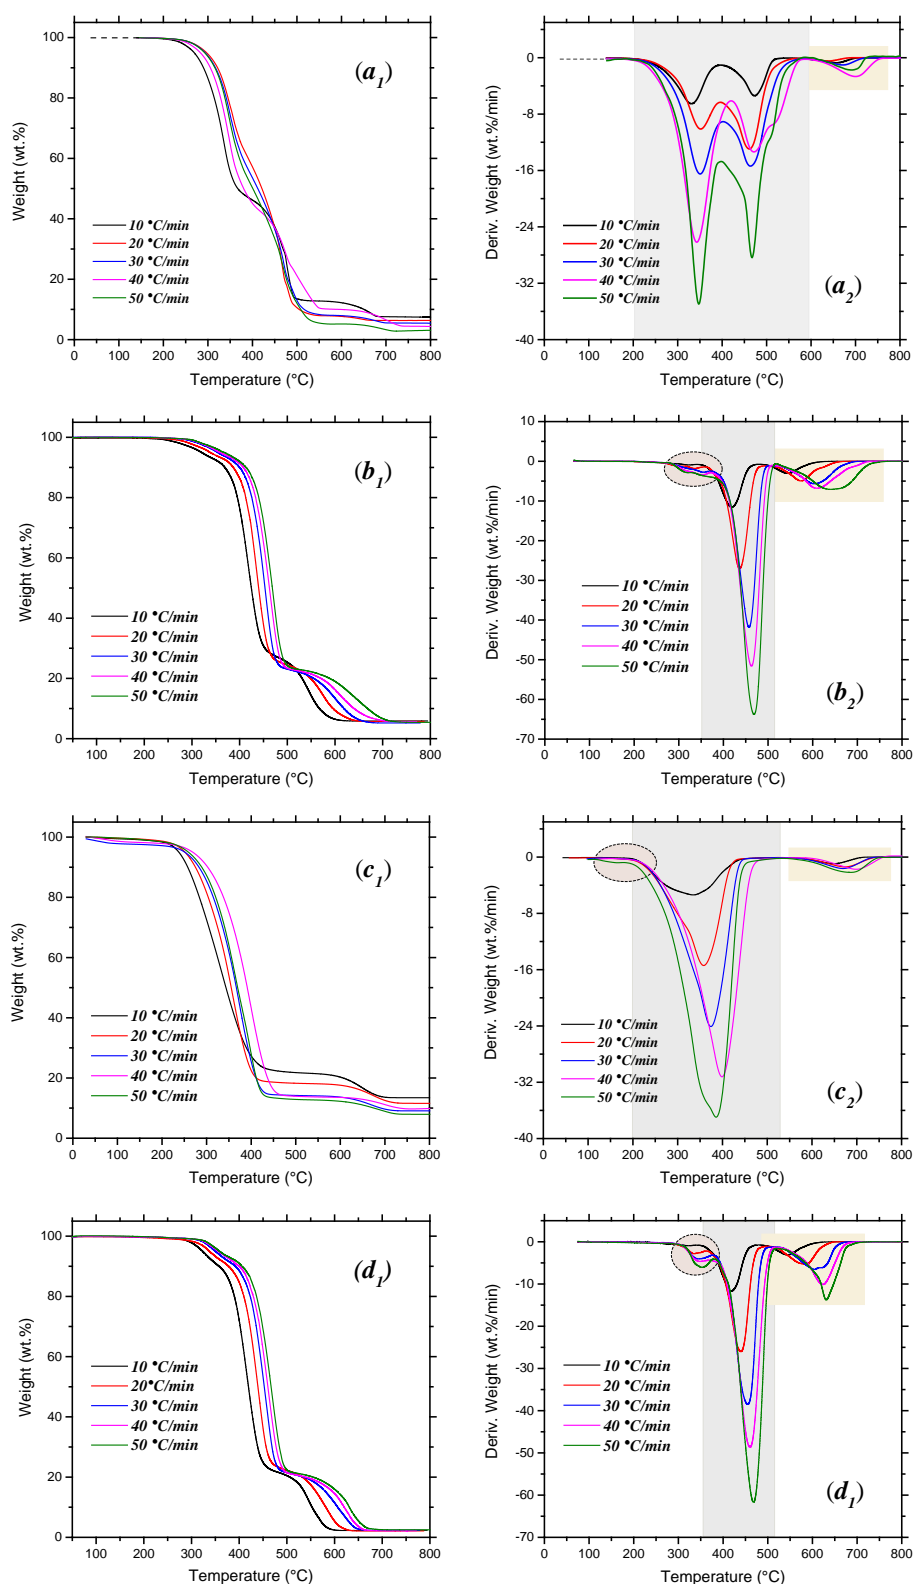

**Figure S1.** Thermogravimetric analysis (TG and DTG curves) of four kinds of industrial polymeric wastes: rubber (a<sub>1</sub> & a<sub>2</sub>), leather (b<sub>1</sub> & b<sub>2</sub>), plastic (c<sub>1</sub> & c<sub>2</sub>) and cloth (d<sub>1</sub> & d<sub>2</sub>) .

**Table S1.** Conventional combustion parameter of four polymeric waste polymers at different heating rates.

| <i>Sample</i>   | $\beta$<br>(°C/min) | $t_i$<br>(min) | $T_i$<br>(°C) | $M_i$<br>wt. % | $t_{max}$<br>(min) | $T_{max}$<br>(°C) | $DTG_{max}$<br>(%/min) | $t_b$<br>(min) | $T_b$<br>(°C) | $M_b$<br>(wt. %) | $DTG_{mean}$<br>(%/min) | $M_f$<br>(wt. %) |
|-----------------|---------------------|----------------|---------------|----------------|--------------------|-------------------|------------------------|----------------|---------------|------------------|-------------------------|------------------|
| <i>Rubber</i>   | 10                  | 25.2           | 282           | 91.9           | 30.1               | 331               | 6.5                    | 65.4           | 684           | 7.91             | 2.09                    | 7.43             |
|                 | 20                  | 13.7           | 303           | 93.8           | 16.1               | 352               | 10.1                   | 31.8           | 665           | 6.47             | 4.82                    | 6.36             |
|                 | 30                  | 9.1            | 302           | 93.2           | 10.7               | 350               | 16.5                   | 22.4           | 700           | 5.67             | 6.59                    | 5.44             |
|                 | 40                  | 6.7            | 297           | 91.8           | 7.83               | 343               | 26.2                   | 17.6           | 732           | 4.81             | 8.00                    | 4.37             |
|                 | 50                  | 5.5            | 303           | 92.6           | 6.37               | 348               | 35.0                   | 13.6           | 708           | 3.16             | 11.0                    | 3.10             |
| <i>Leather</i>  | 10                  | 33.9           | 382           | 86.5           | 37.5               | 418               | 11.6                   | 53.4           | 577           | 8.45             | 4.01                    | 5.85             |
|                 | 20                  | 18.3           | 402           | 85.7           | 20.0               | 437               | 27.0                   | 28.7           | 610           | 8.22             | 7.47                    | 5.70             |
|                 | 30                  | 13.0           | 417           | 84.7           | 14.2               | 453               | 41.8                   | 20.5           | 645           | 6.75             | 10.3                    | 5.19             |
|                 | 40                  | 10.1           | 424           | 85.1           | 11.0               | 462               | 51.6                   | 16.1           | 663           | 7.70             | 13.0                    | 5.66             |
|                 | 50                  | 8.3            | 429           | 85.7           | 9.07               | 468               | 63.8                   | 13.7           | 701           | 6.59             | 14.6                    | 5.40             |
| <i>Plastics</i> | 10                  | 22.4           | 254           | 91.1           | 30.0               | 335               | 5.4                    | 65.8           | 687           | 14.0             | 1.78                    | 13.4             |
|                 | 20                  | 13.0           | 289           | 85.7           | 16.4               | 359               | 15.4                   | 34.1           | 711           | 12.1             | 3.49                    | 11.6             |
|                 | 30                  | 9.1            | 303           | 84.5           | 11.5               | 374               | 24.1                   | 22.7           | 710           | 9.40             | 5.54                    | 9.09             |
|                 | 40                  | 7.4            | 324           | 84.7           | 9.23               | 399               | 31.2                   | 17.6           | 732           | 10.0             | 7.32                    | 9.86             |
|                 | 50                  | 5.5            | 305           | 85.8           | 7.10               | 385               | 37.0                   | 13.9           | 726           | 8.10             | 9.23                    | 7.92             |
| <i>Cloth</i>    | 10                  | 33.2           | 381           | 86.6           | 37.4               | 417               | 12.0                   | 53.6           | 579           | 3.79             | 4.05                    | 2.33             |
|                 | 20                  | 18.3           | 401           | 84.2           | 20.1               | 439               | 25.1                   | 28.7           | 611           | 3.64             | 7.69                    | 2.11             |
|                 | 30                  | 12.9           | 413           | 84.6           | 14.3               | 455               | 38.5                   | 20.5           | 643           | 3.18             | 10.6                    | 2.34             |
|                 | 40                  | 10.0           | 419           | 84.9           | 11.0               | 461               | 49.5                   | 15.8           | 652           | 3.32             | 14.0                    | 2.16             |
|                 | 50                  | 8.3            | 426           | 84.8           | 9.08               | 468               | 61.8                   | 12.9           | 659           | 4.05             | 17.4                    | 2.50             |

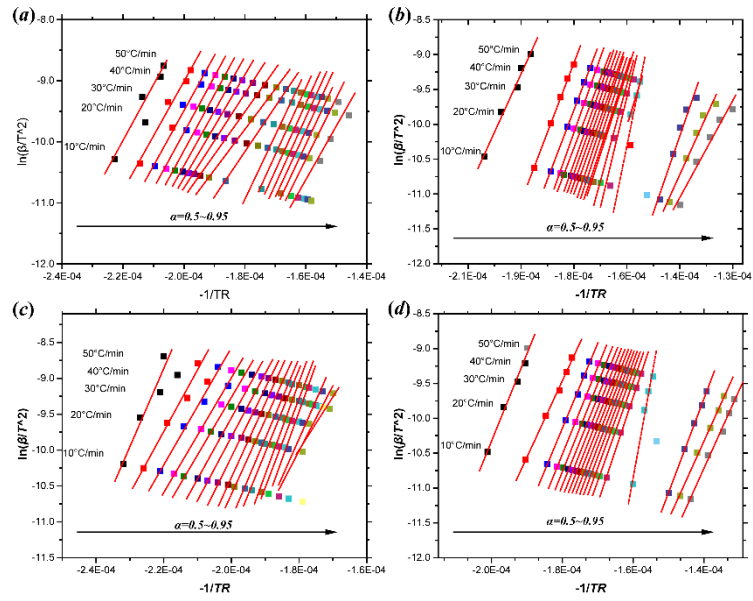

**Figure S2.** KAS fitting results for incineration of typical polymeric wastes: (a) rubber, (b) leather, (c) plastics and (d) cloth.

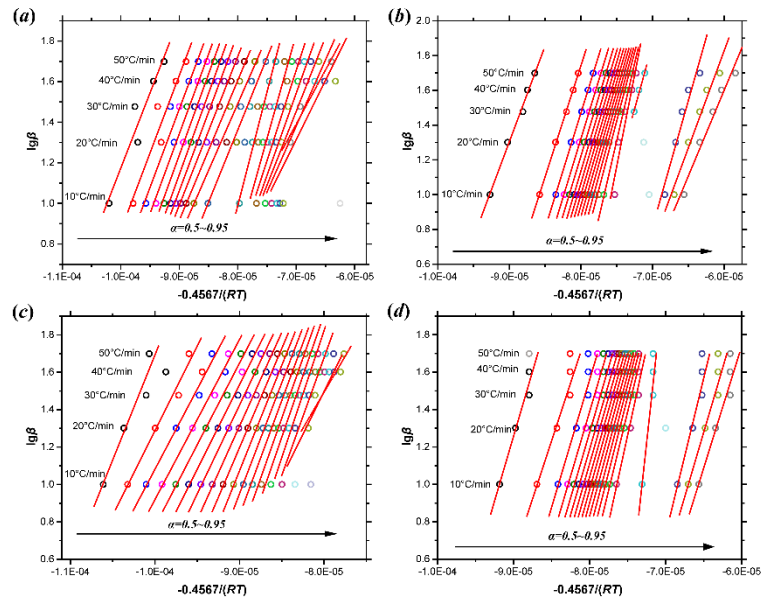

**Figure S3.** FWO fitting results for incineration of typical polymeric wastes: (a) rubber, (b) leather, (c) plastics and (d) cloth.

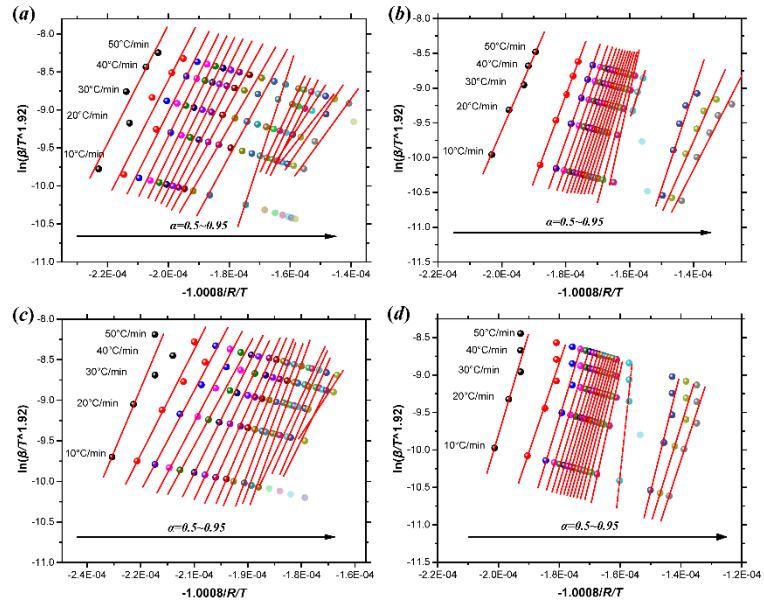

**Figure S4.** STK fitting results for incineration of typical polymeric wastes: (a) rubber, (b) leather, (c) plastics and (d) cloth.

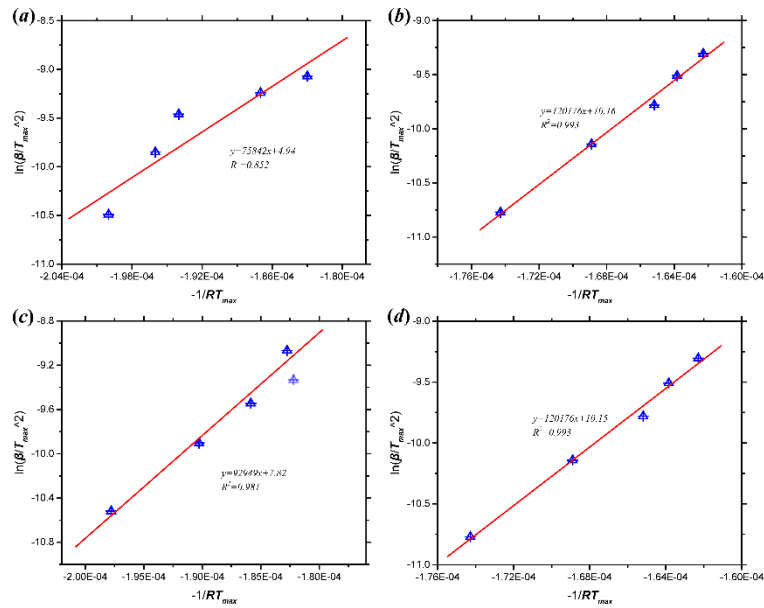

**Figure S5.** Kissinger fitting results for incineration of typical polymeric wastes: (a) rubber, (b) leather, (c) plastics and (d) cloth.

**Table S2.**  $E_a$  and  $R^2$  values of the polymeric wastes according to DAEM, FWO, Starink, and Kissinger.

| $\alpha$  | Waste rubber (kJ/mol)   |       |       |       |       |       | Waste leather (kJ/mol)  |       |       |       |       |       | Waste plastic(kJ/mol) |       |       |       |       |       | Waste cloth (kJ/mol)     |       |       |       |       |       |
|-----------|-------------------------|-------|-------|-------|-------|-------|-------------------------|-------|-------|-------|-------|-------|-----------------------|-------|-------|-------|-------|-------|--------------------------|-------|-------|-------|-------|-------|
|           | DAEM                    |       | FWO   |       | STK   |       | DAEM                    |       | FWO   |       | STK   |       | DAEM                  |       | FWO   |       | STK   |       | DAEM                     |       | FWO   |       | STK   |       |
|           | $E_a$                   | $R^2$ | $E_a$ | $R^2$ | $E_a$ | $R^2$ | $E_a$                   | $R^2$ | $E_a$ | $R^2$ | $E_a$ | $R^2$ | $E_a$                 | $R^2$ | $E_a$ | $R^2$ | $E_a$ | $R^2$ | $E_a$                    | $R^2$ | $E_a$ | $R^2$ | $E_a$ | $R^2$ |
| 0.05      | 87.9                    | 0.896 | 88.9  | 0.896 | 88.2  | 0.896 | 104.1                   | 0.983 | 110.3 | 0.993 | 106.1 | 0.991 | 108.8                 | 0.929 | 112.3 | 0.935 | 104.7 | 0.896 | 125.4                    | 0.993 | 138.7 | 0.962 | 136.0 | 0.956 |
| 0.10      | 82.5                    | 0.886 | 88.4  | 0.886 | 82.9  | 0.887 | 124.4                   | 0.999 | 127.8 | 0.999 | 123.7 | 0.999 | 86.0                  | 0.976 | 90.5  | 0.975 | 86.3  | 0.975 | 109.7                    | 0.998 | 123.9 | 0.960 | 119.8 | 0.953 |
| 0.15      | 82.1                    | 0.887 | 87.4  | 0.887 | 82.4  | 0.888 | 124.5                   | 0.999 | 132.8 | 0.999 | 128.7 | 0.999 | 81.8                  | 0.987 | 85.7  | 0.983 | 82.5  | 0.988 | 122.1                    | 0.998 | 136.5 | 0.959 | 132.8 | 0.953 |
| 0.20      | 86.1                    | 0.884 | 91.0  | 0.884 | 86.5  | 0.885 | 134.7                   | 0.994 | 134.8 | 0.999 | 130.7 | 0.999 | 80.0                  | 0.974 | 85.6  | 0.986 | 83.5  | 0.990 | 125.4                    | 0.996 | 137.8 | 0.958 | 134.0 | 0.952 |
| 0.25      | 85.4                    | 0.880 | 91.3  | 0.880 | 85.8  | 0.881 | 124.5                   | 0.999 | 136.4 | 0.999 | 132.3 | 0.999 | 80.1                  | 0.974 | 87.3  | 0.987 | 80.6  | 0.976 | 126.5                    | 0.997 | 139.8 | 0.957 | 135.9 | 0.951 |
| 0.30      | 81.4                    | 0.873 | 88.0  | 0.873 | 81.8  | 0.875 | 134.8                   | 0.994 | 138.4 | 0.999 | 134.2 | 0.999 | 85.2                  | 0.977 | 90.2  | 0.990 | 88.4  | 0.993 | 126.7                    | 0.997 | 140.0 | 0.957 | 136.1 | 0.951 |
| 0.35      | 78.0                    | 0.863 | 84.3  | 0.863 | 78.4  | 0.864 | 134.8                   | 0.994 | 139.4 | 0.999 | 135.2 | 0.998 | 88.4                  | 0.993 | 94.9  | 0.989 | 92.8  | 0.981 | 128.2                    | 0.997 | 142.0 | 0.956 | 138.1 | 0.950 |
| 0.40      | 68.9                    | 0.846 | 75.3  | 0.846 | 69.3  | 0.848 | 134.9                   | 0.994 | 140.7 | 0.997 | 136.5 | 0.997 | 95.9                  | 0.995 | 100.2 | 0.992 | 96.6  | 0.995 | 129.0                    | 0.998 | 143.9 | 0.957 | 140.0 | 0.951 |
| 0.45      | 60.7                    | 0.833 | 68.4  | 0.833 | 61.1  | 0.835 | 134.9                   | 0.994 | 142.1 | 0.997 | 137.9 | 0.996 | 103.3                 | 0.998 | 106.1 | 0.992 | 103.6 | 0.998 | 130.1                    | 0.999 | 146.6 | 0.958 | 142.8 | 0.952 |
| 0.50      | 58.5                    | 0.830 | 66.4  | 0.830 | 58.9  | 0.832 | 143.9                   | 0.996 | 144.1 | 0.995 | 140.0 | 0.994 | 103.8                 | 0.998 | 112.8 | 0.994 | 104.3 | 0.998 | 131.5                    | 0.999 | 148.9 | 0.959 | 145.1 | 0.953 |
| 0.55      | 64.9                    | 0.871 | 72.3  | 0.871 | 65.3  | 0.872 | 144.1                   | 0.996 | 147.2 | 0.994 | 143.1 | 0.993 | 111.7                 | 0.996 | 118.6 | 0.995 | 119.5 | 0.992 | 133.8                    | 0.999 | 151.3 | 0.960 | 147.6 | 0.953 |
| 0.60      | 89.6                    | 0.755 | 97.0  | 0.993 | 90.0  | 0.824 | 144.4                   | 0.996 | 151.5 | 0.992 | 147.6 | 0.991 | 116.0                 | 0.975 | 122.7 | 0.988 | 116.7 | 0.974 | 135.9                    | 0.999 | 156.2 | 0.960 | 152.7 | 0.954 |
| 0.65      | 93.8                    | 0.801 | 100.6 | 0.845 | 94.2  | 0.845 | 146.7                   | 0.978 | 157.7 | 0.99  | 154.1 | 0.988 | 128.8                 | 0.966 | 128.4 | 0.973 | 120.8 | 0.985 | 138.8                    | 0.999 | 161.0 | 0.961 | 157.6 | 0.955 |
| 0.70      | 85.2                    | 0.823 | 92.8  | 0.751 | 85.7  | 0.834 | 173.1                   | 0.974 | 177.9 | 0.982 | 175.2 | 0.98  | 124.0                 | 0.914 | 131.4 | 0.934 | 93.8  | 0.816 | 142.5                    | 0.999 | 167.8 | 0.961 | 164.8 | 0.955 |
| 0.75      | 84.9                    | 0.830 | 93.9  | 0.842 | 85.3  | 0.855 | 197.5                   | 0.880 | 210.2 | 0.918 | 209.0 | 0.909 | 131.8                 | 0.816 | 135.8 | 0.841 | 97.9  | 0.711 | 152.2                    | 0.998 | 186.4 | 0.955 | 184.2 | 0.949 |
| 0.80      | 83.2                    | 0.826 | 91.3  | 0.824 | 83.6  | 0.872 | 153.3                   | 0.989 | 148.4 | 0.984 | 143.7 | 0.981 | 131.0                 | 0.678 | 125.8 | 0.807 | 102.2 | 0.790 | 278.3                    | 0.989 | 372.2 | 0.961 | 379.0 | 0.959 |
| 0.85      | 83.2                    | 0.812 | 92.1  | 0.832 | 83.7  | 0.836 | 137.5                   | 0.963 | 145.0 | 0.942 | 139.0 | 0.93  | 116.4                 | 0.755 | 91.6  | 0.744 | 88.8  | 0.764 | 134.8                    | 0.998 | 166.7 | 0.958 | 162.1 | 0.951 |
| 0.90      | 73.0                    | 0.781 | 82.1  | 0.841 | 73.5  | 0.792 | 104.5                   | 0.964 | 111.6 | 0.967 | 103.5 | 0.958 | 73.7                  | 0.889 | 77.1  | 0.896 | 67.4  | 0.824 | 112.1                    | 0.997 | 138.0 | 0.962 | 131.6 | 0.954 |
| 0.95      | 71.4                    | 0.834 | 80.0  | 0.951 | 71.9  | 0.812 | 87.0                    | 0.963 | 98.5  | 0.969 | 89.4  | 0.957 | —                     | —     | —     | —     | —     | —     | 112.7                    | 0.992 | 130.4 | 0.961 | 123.2 | 0.953 |
| Average   | 79.0                    | 0.843 | 85.9  | 0.865 | 79.4  | 0.854 | 136.0                   | 0.982 | 141.8 | 0.985 | 137.4 | 0.982 | 102.6                 | 0.933 | 105.4 | 0.945 | 96.1  | 0.925 | 136.6                    | 0.997 | 159.4 | 0.959 | 156.0 | 0.953 |
| Kissinger | $Ea=75.842, R^2=0.8520$ |       |       |       |       |       | $Ea=121.43, R^2=0.9957$ |       |       |       |       |       | $Ea=92.9, R^2=0.9812$ |       |       |       |       |       | $Ea=120.175, R^2=0.9926$ |       |       |       |       |       |

**Table S3.** Thermodynamic parameters for the polymeric wastes combustions using FWO at 20 K/min.

| $\alpha$       | Waste rubber           |                     |                     |                      | Waste leather          |                     |                     |                      | Waste plastic          |                     |                     |                      | Waste cloth            |                     |                     |                      |
|----------------|------------------------|---------------------|---------------------|----------------------|------------------------|---------------------|---------------------|----------------------|------------------------|---------------------|---------------------|----------------------|------------------------|---------------------|---------------------|----------------------|
|                | $A$ (s <sup>-1</sup> ) | $\Delta H$ (kJ/mol) | $\Delta G$ (kJ/mol) | $\Delta S$ (J/mol/K) | $A$ (s <sup>-1</sup> ) | $\Delta H$ (kJ/mol) | $\Delta G$ (kJ/mol) | $\Delta S$ (J/mol/K) | $A$ (s <sup>-1</sup> ) | $\Delta H$ (kJ/mol) | $\Delta G$ (kJ/mol) | $\Delta S$ (J/mol/K) | $A$ (s <sup>-1</sup> ) | $\Delta H$ (kJ/mol) | $\Delta G$ (kJ/mol) | $\Delta S$ (J/mol/K) |
| 0.05           | 2.45×10 <sup>5</sup>   | 84.2                | 181.3               | -155.4               | 1.14×10 <sup>6</sup>   | 105.2               | 207.0               | -0.143               | 2.17×10 <sup>7</sup>   | 107.9               | 182.3               | -117.7               | 1.66×10 <sup>8</sup>   | 133.7               | 206.2               | -102.0               |
| 0.10           | 2.20×10 <sup>5</sup>   | 83.5                | 181.4               | -156.6               | 2.55×10 <sup>7</sup>   | 122.3               | 206.1               | -0.118               | 2.74×10 <sup>5</sup>   | 85.9                | 183.4               | -154.3               | 1.20×10 <sup>7</sup>   | 118.5               | 206.9               | -124.2               |
| 0.15           | 1.79×10 <sup>5</sup>   | 82.3                | 181.4               | -158.5               | 6.19×10 <sup>7</sup>   | 127.2               | 205.9               | -0.111               | 1.04×10 <sup>5</sup>   | 81.0                | 183.7               | -162.5               | 1.11×10 <sup>8</sup>   | 130.9               | 206.3               | -105.9               |
| 0.20           | 3.73×10 <sup>5</sup>   | 85.8                | 181.2               | -152.6               | 8.93×10 <sup>7</sup>   | 129.1               | 205.8               | -0.108               | 1.02×10 <sup>5</sup>   | 80.8                | 183.7               | -162.8               | 1.40×10 <sup>8</sup>   | 132.1               | 206.3               | -104.2               |
| 0.25           | 3.98×10 <sup>5</sup>   | 86.1                | 181.2               | -152.2               | 1.18×10 <sup>8</sup>   | 130.7               | 205.7               | -0.106               | 1.43×10 <sup>5</sup>   | 82.4                | 183.6               | -160.1               | 1.99×10 <sup>8</sup>   | 134.1               | 206.2               | -101.3               |
| 0.30           | 2.05×10 <sup>5</sup>   | 82.7                | 181.4               | -157.8               | 1.67×10 <sup>8</sup>   | 132.6               | 205.6               | -0.103               | 2.60×10 <sup>5</sup>   | 85.3                | 183.4               | -155.3               | 2.08×10 <sup>8</sup>   | 134.3               | 206.2               | -101.0               |
| 0.35           | 9.63×10 <sup>4</sup>   | 79.0                | 181.6               | -164.2               | 2.00×10 <sup>8</sup>   | 133.6               | 205.6               | -0.101               | 6.59×10 <sup>5</sup>   | 89.9                | 183.2               | -147.7               | 2.92×10 <sup>8</sup>   | 136.1               | 206.1               | -98.3                |
| 0.40           | 1.53×10 <sup>4</sup>   | 69.9                | 182.2               | -179.7               | 2.50×10 <sup>8</sup>   | 134.8               | 205.5               | -0.100               | 1.93×10 <sup>6</sup>   | 95.1                | 182.9               | -138.8               | 4.11×10 <sup>8</sup>   | 138.1               | 206.0               | -95.5                |
| 0.45           | 3.64×10 <sup>3</sup>   | 62.8                | 182.7               | -191.8               | 3.20×10 <sup>8</sup>   | 136.2               | 205.5               | -0.098               | 6.26×10 <sup>6</sup>   | 101.0               | 182.6               | -129.2               | 6.63×10 <sup>8</sup>   | 140.7               | 205.9               | -91.5                |
| 0.50           | 2.41×10 <sup>3</sup>   | 60.7                | 182.8               | -195.4               | 4.57×10 <sup>8</sup>   | 138.2               | 205.4               | -0.095               | 2.39×10 <sup>7</sup>   | 107.6               | 182.3               | -118.1               | 9.86×10 <sup>8</sup>   | 143.0               | 205.8               | -88.3                |
| 0.55           | 8.25×10 <sup>3</sup>   | 66.5                | 182.4               | -185.4               | 7.86×10 <sup>8</sup>   | 141.2               | 205.3               | -0.090               | 7.62×10 <sup>7</sup>   | 113.4               | 182.0               | -108.6               | 1.49×10 <sup>9</sup>   | 145.3               | 205.7               | -84.9                |
| 0.60           | 1.27×10 <sup>6</sup>   | 91.1                | 180.9               | -143.7               | 1.68×10 <sup>9</sup>   | 145.5               | 205.1               | -0.084               | 1.70×10 <sup>8</sup>   | 117.4               | 181.8               | -101.9               | 3.58×10 <sup>9</sup>   | 150.2               | 205.5               | -77.7                |
| 0.65           | 2.62×10 <sup>6</sup>   | 94.6                | 180.7               | -137.7               | 5.02×10 <sup>9</sup>   | 151.7               | 204.9               | -0.075               | 5.29×10 <sup>8</sup>   | 123.1               | 181.6               | -92.6                | 8.19×10 <sup>9</sup>   | 154.9               | 205.4               | -70.8                |
| 0.70           | 5.39×10 <sup>5</sup>   | 86.7                | 181.1               | -151.0               | 1.74×10 <sup>11</sup>  | 171.8               | 204.1               | -0.046               | 9.59×10 <sup>8</sup>   | 126.1               | 181.5               | -87.7                | 2.73×10 <sup>10</sup>  | 161.8               | 205.1               | -60.9                |
| 0.75           | 6.75×10 <sup>5</sup>   | 87.8                | 181.0               | -149.2               | 4.91×10 <sup>13</sup>  | 204.1               | 203.2               | 0.001                | 2.28×10 <sup>9</sup>   | 130.4               | 181.3               | -80.6                | 6.98×10 <sup>11</sup>  | 180.3               | 204.5               | -34.0                |
| 0.80           | 3.98×10 <sup>5</sup>   | 85.1                | 181.2               | -153.7               | 9.71×10 <sup>8</sup>   | 141.9               | 205.2               | -0.089               | 3.18×10 <sup>8</sup>   | 120.4               | 181.7               | -97.0                | 6.01×10 <sup>25</sup>  | 365.7               | 200.4               | 232.2                |
| 0.85           | 4.75×10 <sup>5</sup>   | 85.9                | 181.1               | -152.3               | 5.35×10 <sup>8</sup>   | 138.1               | 205.4               | -0.095               | 3.42×10 <sup>5</sup>   | 86.1                | 183.4               | -153.9               | 2.26×10 <sup>10</sup>  | 159.9               | 205.2               | -63.6                |
| 0.90           | 6.14×10 <sup>4</sup>   | 75.8                | 181.7               | -169.5               | 1.44×10 <sup>6</sup>   | 104.6               | 206.9               | -0.144               | 1.84×10 <sup>4</sup>   | 71.6                | 184.3               | -178.4               | 1.46×10 <sup>8</sup>   | 131.0               | 206.3               | -105.7               |
| 0.95           | 3.99×10 <sup>4</sup>   | 73.6                | 181.9               | -173.3               | 1.39×10 <sup>5</sup>   | 91.3                | 207.6               | -0.164               | —                      | —                   | —                   | —                    | 3.80×10 <sup>7</sup>   | 123.2               | 206.6               | -117.1               |
| <b>Average</b> | 4.12×10 <sup>5</sup>   | 80.2                | 181.5               | -162.114             | 2.59×10 <sup>12</sup>  | 135.8               | 205.6               | -0.10                | 2.44×10 <sup>8</sup>   | 100.3               | 182.7               | -130.4               | 3.16×10 <sup>24</sup>  | 153.4               | 205.6               | -73.4                |

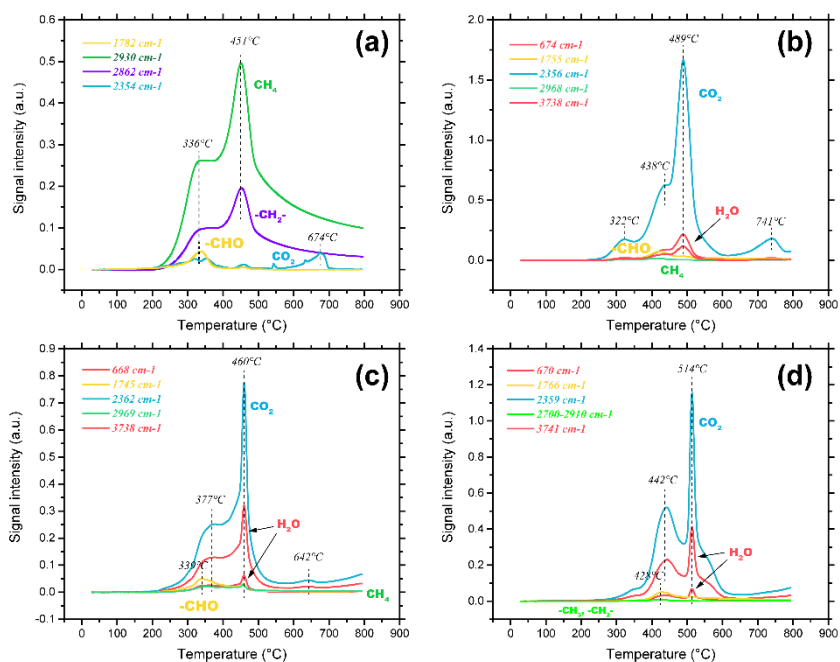

**Figure S6.** The intensity evolution of main infrared absorption peaks with temperature.



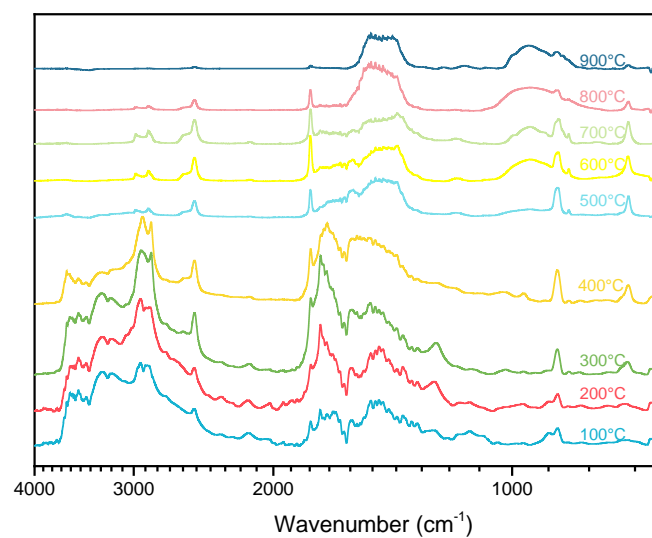

**Figure S7.** FTIR spectra of residual phase of waste rubber at different combustion temperature.

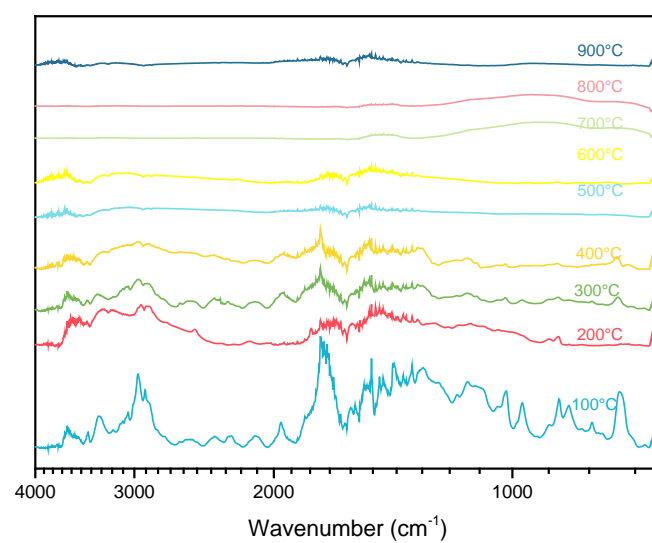

**Figure S8.** FTIR spectra of residual phase of waste leather at different combustion temperature.

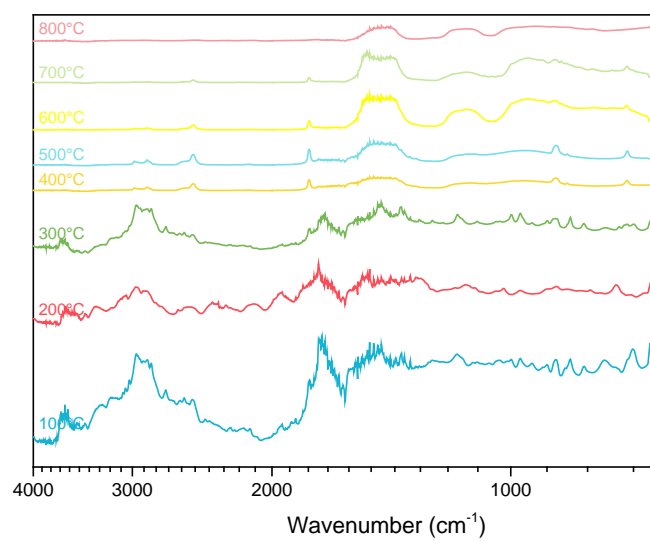

**Figure S9.** FTIR spectra of residual phase of waste at different combustion temperature.

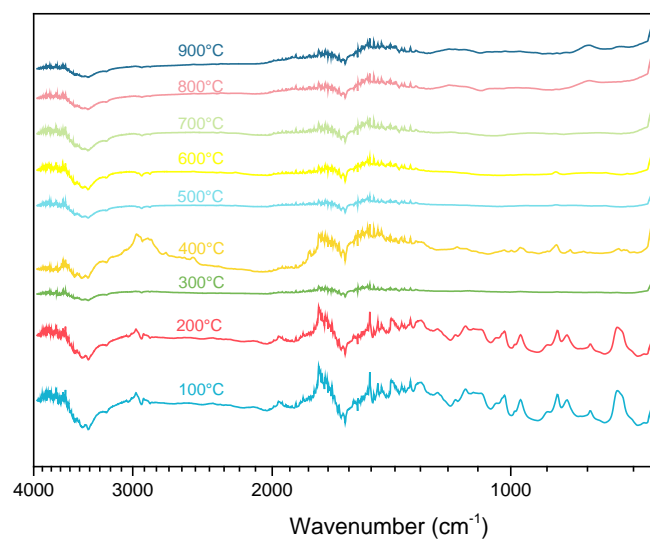

**Figure S10.** FTIR spectra of residual phase of waste cloth at different combustion temperature.
